# Supplementary material for: Impacts of Temporal Changes in Land Use/Cover on the Remaining Historical Forests in Guiyang, China
Source: MDPI journal article supplement (doi:10.3390/f13020146), 2022-01-19
Supplement: s1 [file s1]

## Supplementary Material

**Table S1** Transition matrix of land use/cover from 1978 to 1993 in the built-up area of Guiyang (ha)

| 1978       | 1993       |           |            |            |          |          |
|------------|------------|-----------|------------|------------|----------|----------|
|            | Forestland | Grassland | Water body | Urban land | Farmland | Total    |
| Forestland | 4792.14    | 0         | 0          | 124.65     | 8.73     | 4920.21  |
| Grassland  | 1.71       | 4320.45   | 0          | 85.05      | 14.31    | 4420.08  |
| Water body | 0          | 0         | 68.31      | 0          | 0        | 68.13    |
| Urban land | 0          | 0         | 0          | 14618.2    | 0        | 14626.08 |
| Farmland   | 20.97      | 9.99      |            | 409.68     | 7418.43  | 7857.45  |
| Total      | 4814.82    | 4330.44   | 68.31      | 15237.58   | 7441.47  |          |

**Table S2** Transition matrix of land use/cover from 1993 to 2001 in the built-up area of Guiyang (ha)

| 1993       | 2001       |           |            |            |          |         |
|------------|------------|-----------|------------|------------|----------|---------|
|            | Forestland | Grassland | Water body | Urban land | Farmland | Total   |
| Forestland | 4679.19    | 0         | 0          | 140.94     | 2.52     | 4822.65 |
| Grassland  | 0          | 4330.44   | 0          | 0          | 0        | 4330.44 |
| Water body | 0          | 0         | 68.31      | 0          | 0        | 68.31   |
| Urban land | 0          | 0         | 0          | 15229.8    | 0        | 15229.8 |
| Farmland   | 0.81       | 0         | 0          | 17.46      | 7423.2   | 7441.47 |
| Total      | 4680       | 4330.44   | 68.31      | 15388.2    | 7425.72  |         |

**Table S3** Transition matrix of land use/cover from 2001 to 2009 in the built-up area of Guiyang (ha)

| 2001       | 2009       |           |            |            |          |         |
|------------|------------|-----------|------------|------------|----------|---------|
|            | Forestland | Grassland | Water body | Urban land | Farmland | Total   |
| Forestland | 4441.86    | 1.26      | 0          | 236.43     | 0.45     | 4680    |
| Grassland  | 39.06      | 3315.15   | 0          | 847.53     | 128.7    | 4330.44 |
| Water body | 0          | 0         | 68.31      | 0          | 0        | 68.31   |
| Urban land | 0          | 0         | 0          | 15388.2    | 0        | 15388.2 |
| Farmland   | 13.59      | 10.89     | 1.53       | 937.44     | 6462.27  | 7425.72 |
| Total      | 4494.51    | 3327.3    | 69.84      | 17409.6    | 6591.42  |         |

**Table S4** Transition matrix of land use/cover from 2009 to 2018 in the built-up area of Guiyang (ha)

| 2009       | 2018       |           |            |            |          |         |
|------------|------------|-----------|------------|------------|----------|---------|
|            | Forestland | Grassland | Water body | Urban land | Farmland | Total   |
| Forestland | 2964.33    | 0.09      | 0          | 1526.58    | 3.51     | 4494.51 |
| Grassland  | 1.26       | 1356.93   | 0          | 1962.36    | 6.75     | 3327.3  |
| Water body | 0          | 0         | 69.66      | 0          | 0        | 69.66   |
| Urban land | 0          | 0         | 0          | 17409.6    | 0        | 17409.6 |
| Farmland   | 10.62      | 10.17     | 0          | 4648.32    | 1922.31  | 6591.42 |
| Total      | 2958.66    | 1367.73   | 69.66      | 24245.01   | 2759.85  |         |
